# Supplementary material
Source: MDPI journal article supplement (https://www.mdpi.com/2311-7524/10/5/509)
Supplement: s1 [file s1]

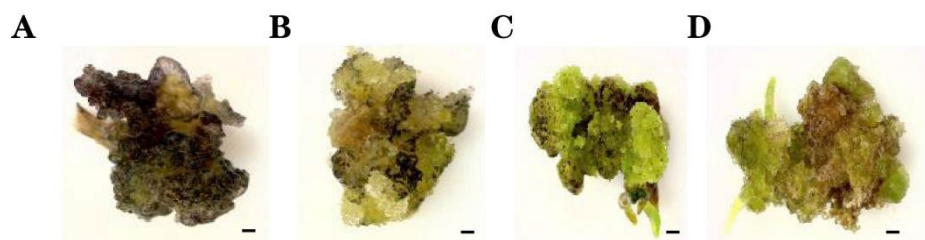

**Figure S1.** Different concentrations of NAA induced the accumulation of anthocyanins in the callus tissue. (A) Induction of callus tissues by 0.2 mg/L NAA. (B) Induction of callus tissues by 0.1 mg/L NAA. (C) Induction of callus tissues by 0.5 mg/L NAA. (D) Induction of callus tissues by 1.0 mg/L NAA. Scale=1cm.

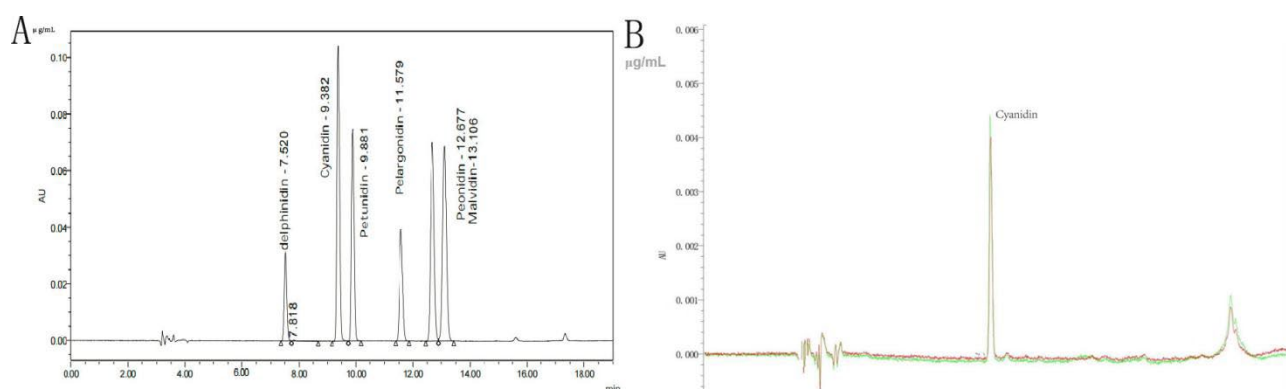

**FigureS2.** Testing and analysing anthocyanins in lilies. (A) The chromatographic peaks of the six anthocyanin standards at 530nm. (B) The chromatography peaks of cyanidin in *Lilium concolor* var. *pulchellum*.

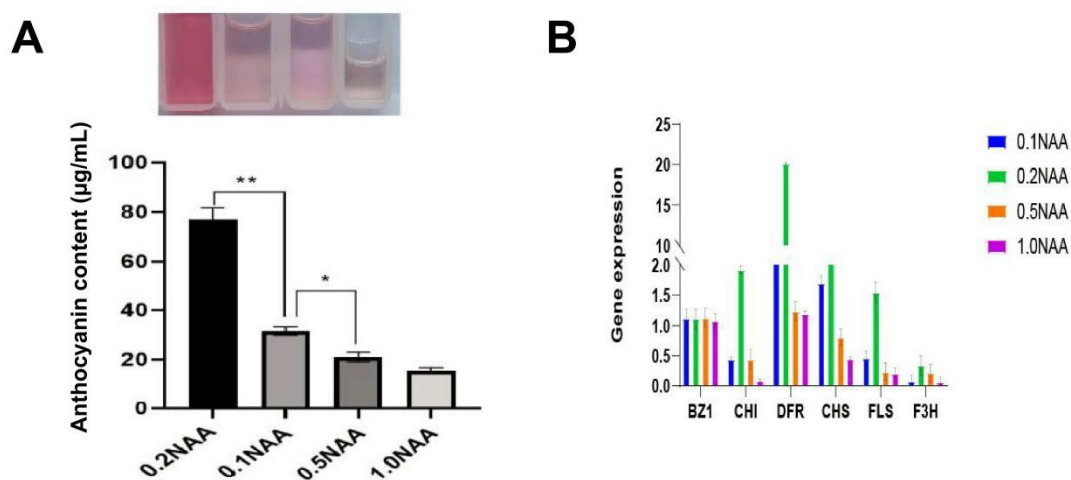

**Figure S3.** Extraction analysis of anthocyanins and gene expression analysis of the pathways involved in flavonoids metabolism. (A) Extraction and analysis of callus tissues in different concentrations of NAA. (B) Relative quantitative analysis of the expression of genes involved in the flavonoid metabolic pathway. The one and two asterisk indicates a significant difference between different NAA treatments at  $P < 0.05$  and  $P < 0.01$  respectively, t-test.

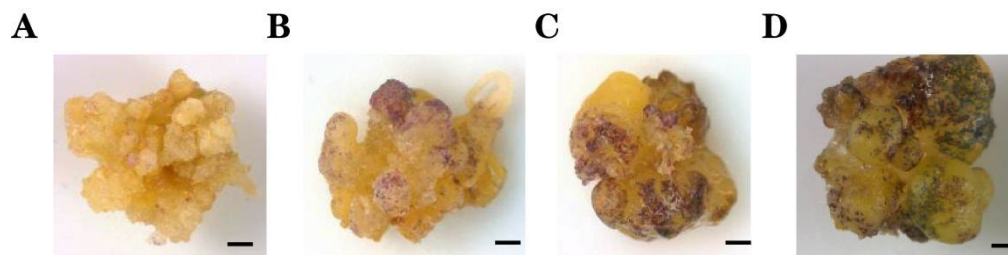

**Figure S4.** Phenotypic observation of 0.2 mg/L NAA induced healing tissues at different times. (A) The phenotype of anthocyanin accumulation in 2d. (B) The phenotype of anthocyanin accumulation in 5d. (C) The phenotype of anthocyanin accumulation in 10d. (D) The phenotype of anthocyanin accumulation in 15d. Scale=1cm.

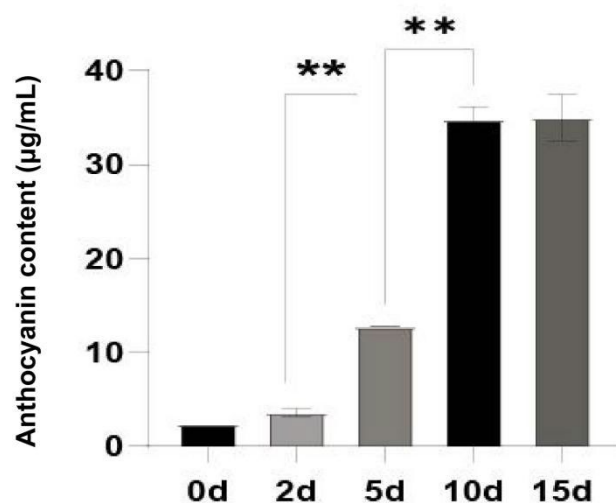

**Figure S5.** Determination of anthocyanin deposition by 0.2 mg/L NNAA during induction of lily callus tissue in different time by HPLC. The two asterisk indicates a significant difference between different NAA treatments at  $P < 0.01$ , t-test.

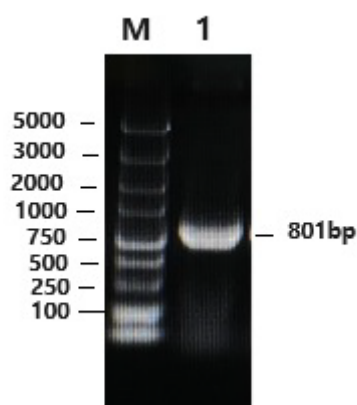

**Figure S6.** Cloning of *LhMYB1* gene. M refer to DNA 5000 marker; 1 refer to the PCR

fragment of *LhMYB1* gene.

**LhMYB1 gene cDNA whole sequence:**

>transcript\_HQ\_LH\_transcript43717/f5p0/1056

ATGGGAAGGCCACCTTGCTGTGACAAGCTGGGAGTGAAGAAAGGCCCTTGGACT  
CCAGAGGAGGACATCACTCTGGTGTCTACATCCAGGAACATGGCCCTGGGAATT  
GGAGGGCAGTTCCTACAATTACAGGGCTGATGAGGTGCAGCAAGAGCTGCAGGC  
TTAGATGGACCAACTACCTCCGTCCAGGGATCAAGAGAGGCGATTTCACAGATCA  
GGAGGAGAAGCTAATAATCCATCTCCAAGCTCTTCTTGGCAATAGATGGGCAGCT  
ATAGCATCCTACCTCCCGGAGAGAACTGATAACGACATCAAGAACTACTGGAAC  
ACCCATCTCAAGAAGAAGCTGAAGAGGACCCAGACAGGTGTTACCATCGATGAC  
ACTCCGACGAGCAGGAGCCAGCAGCCCTCTAAAGGGCAGTGGGAGAGGAGGCT  
CCAGACAGACATCAACACAGCAAAGAGGGCCCTCTACGAAGCCATCGCTATTGA  
TATCCCCAATTCTCCACCTAGCATGTTGCCCTATCTCCACTGCCACCACATCGA  
CCACCTATGCGTCGAGCACTGAGAACATAGCTCGACTGCTTGAAGGGTGGATGGG  
AGGATCGGGGAAACCGGATGGAGCCTCCACTTCTTCAAGTGAGGCTCGAACGGA  
GCCGGAGCCGGAGCCGGAGCCGTCGGAGACAAGCATGTTACAGGAGGGGGCCCG  
CCGGGCCATTGTCATTGCTGGAGTGGTTGTTTGATGGGAGTGAATGCGAGGGATTA  
CTTGACATGAACTTGATACTGGGGATGAGTTGTTCTAA

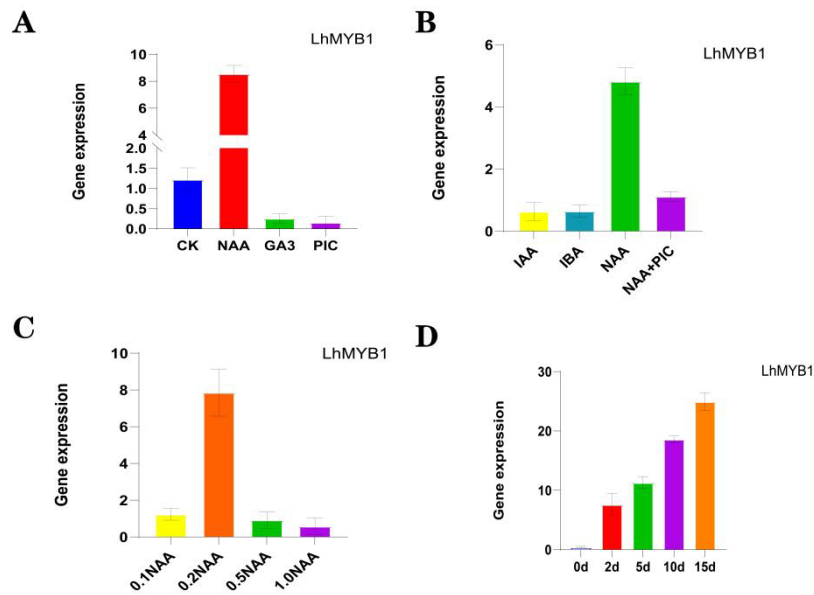

**Figure S7.** Analysing the relative quantitative expression of *LhMYB1* under varying conditions. (A) Relative quantitative expression analysis of *LhMYB1* gene under different PGRs, including CK, NAA, GA3 and picloram. (B) Relative quantitative expression analysis of *LhMYB1* gene under different PGRs, including IAA, IBA, NAA and NAA+picloram. (C) Relative quantitative expression analysis of *LhMYB1* gene under different NAA concentrations, including 0.1 mg/L, 0.2 mg/L, 0.5 mg/L and 1.0 mg/L NAA. (D) Relative quantitative expression analysis of *LhMYB1* gene under different days, including 0, 2, 5, 10, and 15 d.

**Table S1.** List of gene-specific primers used for gene cloning.

|                                     | Gene and primer name          | Forward primer (5' to 3')                     | Reverse primer (5' to 3')                     | Source     |
|-------------------------------------|-------------------------------|-----------------------------------------------|-----------------------------------------------|------------|
| Gene cloning for pGXT-LhMYB1        | <i>LhMYB1</i> (MYBF/MYBR)     | ATGGAAGGCCACCTTGCTGTGAC                       | TTAGAACAACCTCATCCCCAGTATC                     | This study |
| Gene cloning for pCAMBIA1302-LhMYB1 | <i>LhMYB1</i> (MYB1F/MYB1F)   | GGCATGGTAGATCTGACTAGTTTTCACA<br>GATCAGGAGGAGA | AAGTTCCTCTCCTTTACTAGTGTGGAGGATAGGG<br>CAACA   | This study |
| Gene cloning for TRV2-LhMYB1        | <i>LhMYB1</i> (MYB2F/MYB2R)   | TGAGTAAGGTTACCGGAATTCATGGGCA<br>GCTATAGCATCCT | GGGACATGCCCCGGGCTCGAGTCAATAGCGATG<br>GCTTCGTA | This study |
| RT-PCR for CP                       | <i>CP</i> (CPF/CPR)           | CTAACAGTGCTCTTGTTGATG                         | CAACTCCATGTTCTCTAACGAAGT                      | This study |
| RT-PCR for MP                       | <i>MP</i> (MPF/MPR)           | CGCAGTACAAGGTTGAATACAGT                       | CTCAATCGTCTTCATCTCCACTT                       | This study |
| qRT-PCR for LhMYB1                  | <i>LhMYB1</i> (RtMYBF/RtMYBR) | CATTGCTGGAGTGGTTGT                            | ATCCCCAGTATCAAGTTTC                           | This study |
| qRT-PCR for BZ1                     | <i>BZ1</i> (BZF/BZR)          | CGAGAAGCAGATTGGGTTGTT                         | TCAGTGTTGAGGTGGGCAGA                          | This study |
| qRT-PCR for CHS                     | <i>CHS</i> (CHSF/CHSR)        | CGAGTGCCTGCGTGTTGT                            | CCATCTTCGCTGATGTCTTTC                         | This study |
| qRT-PCR for CHI                     | <i>CHI</i> (CHIF/CHIR)        | CTCCTACTCCTTCTCATCACC                         | GGAGGAAGATGAAGATGGTAG                         | This study |
| qRT-PCR for F3'H                    | <i>F3'H</i> (F3F/F3R)         | AGAAATGGCTCCGGTTGC                            | CCGAATCGGTCCATCCTC                            | This study |
| qRT-PCR for DFR                     | <i>DFR</i> (DFF/DFR)          | GCAAGAAGGTGATGGCTCAG                          | TGGTTGATCTCGCCTTTCCT                          | This study |
| qRT-PCR for FLS                     | <i>FLS</i> (FLF/FLR)          | AGTGAAGCCCTAGOCACC                            | ATGCTCGGAGCGGATGAA                            | This study |
| EF-1a as an internal reference gene | <i>EF-1a</i> (EFF/EFR)        | GCATCACACCTTCTACAACG                          | GAAGAGCATAACCCTCATAGA                         | This study |
